# Supplementary material for: Biogas slurry application alters soil properties, reshapes the soil microbial community, and alleviates root rot of Panax notoginseng
Source: PeerJ. 2022 Jul 26;10:e13770. doi: 10.7717/peerj.13770 (PMC9336633; doi:10.7717/peerj.13770)
Supplement: Supplemental Information 7 [file peerj-10-13770-s007.xlsx]

## Sheet: Bacteria-Fungi-count
sample	Bacteria (10^6 CFU/g soil)	Fungi (10^4 CFU/g soil)	Fusarium (10^4 CFU/g soil)	Fusarium/Fungi (%)	Fungi/Bacteria (%)	group
Soil1	215	130	30	23.08	0.6	Soil
Soil2	220	125	25	20	0.57	Soil
Soil3	201	110	25	22.73	0.55	Soil
CK1.15d	218	111	28	25.23	0.51	CK15d
CK2.15d	203	99	20	20.2	0.49	CK15d
CK3.15d	195	98	24	24.49	0.5	CK15d
CK1.30d	199	105	26	24.76	0.53	CK30d
CK2.30d	186	97	25	25.77	0.52	CK30d
CK3.30d	205	95	20	21.05	0.46	CK30d
CH1.15d	180	65	7	10.77	0.36	CH15d
CH2.15d	190	53	5	9.43	0.28	CH15d
CH3.15d	172	59	4	6.78	0.34	CH15d
CH1.30d	216	43	5	11.63	0.2	CH30d
CH2.30d	225	55	5	9.09	0.24	CH30d
CH3.30d	210	51	3	5.88	0.24	CH30d
CF1.15d	170	55	10	18.18	0.32	CF15d
CF2.15d	180	50	5	10	0.28	CF15d
CF3.15d	190	42	7	16.67	0.22	CF15d
CF1.30d	195	43	8	18.6	0.22	CF30d
CF2.30d	235	40	7	17.5	0.17	CF30d
CF3.30d	220	37	5	13.51	0.17	CF30d
